# Supplementary material
Source: PubMed Central journal article supplement (PMC6105875)
Supplement: zii999092506s1.pdf [file zii999092506s1.pdf]

## Supplementary Information

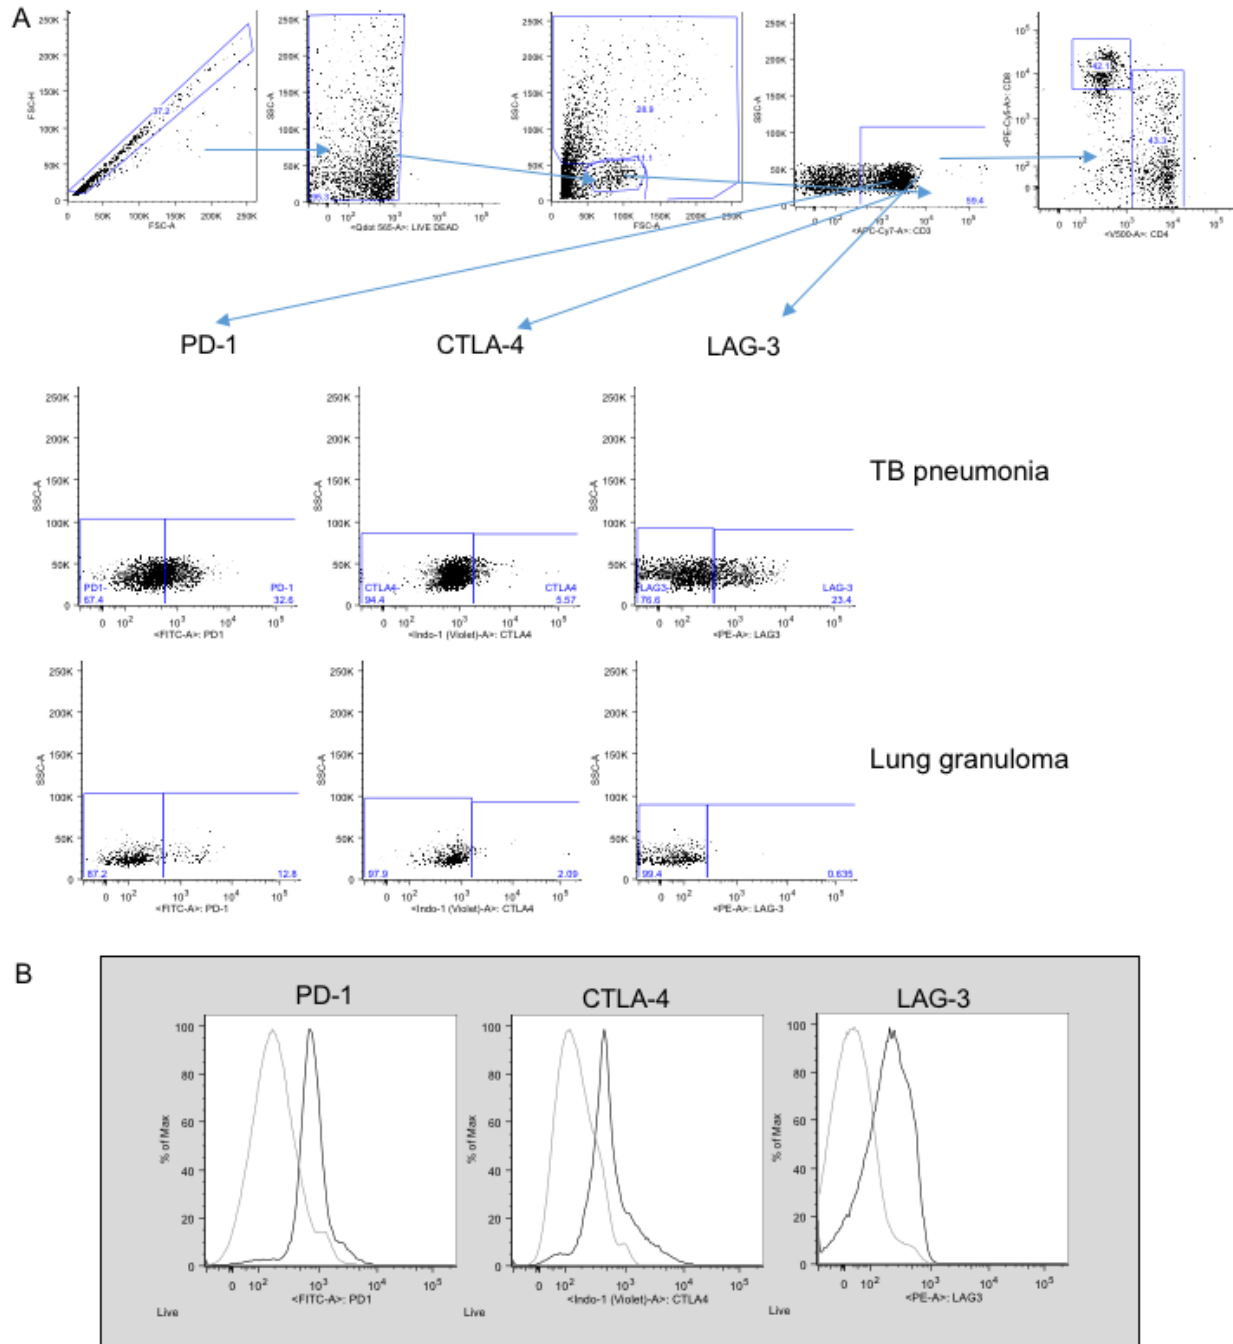

**Supp Fig 1. Gating strategy and positive control examples for flow cytometry antibodies against inhibitory receptors in single cell suspensions.**

(A) Flow cytometry gating strategy example from TB pneumonia sample excised from Mtb-infected cynomolgus macaque. (B) Testing of flow cytometry antibodies in PBMCs isolated from Mtb-infected cynomolgus macaque stimulated by PDBU & ionomycin for 3 hours at 37°C.

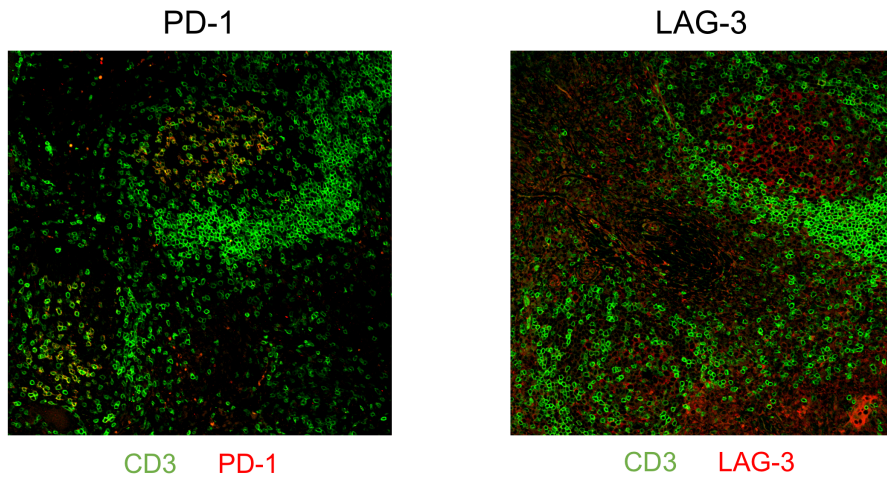

**Supp Fig 2. Positive control examples for immunofluorescence antibodies against PD-1 and LAG-3 in paraffin-embedded samples, using lymph node sections as positive controls.**

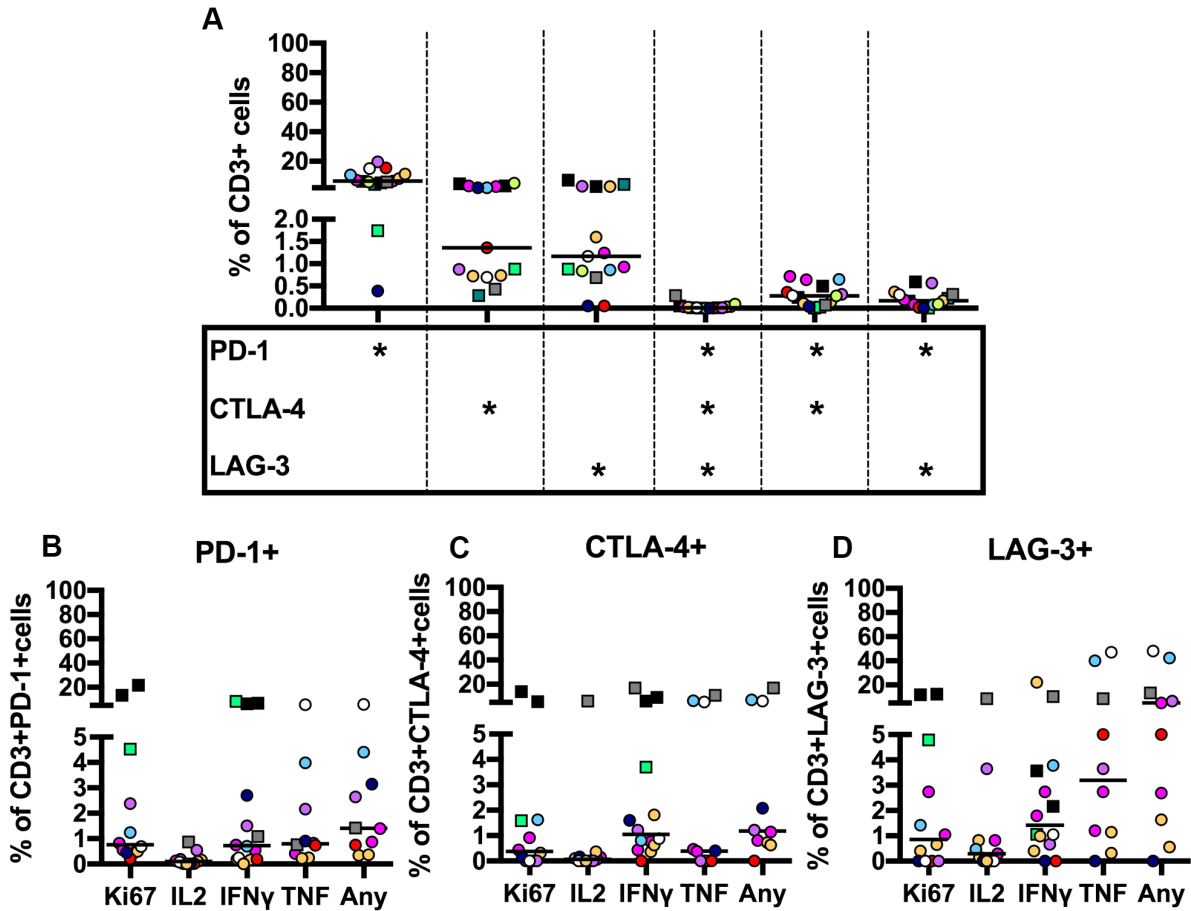

**Supp Fig 3. Frequency of inhibitory receptor expression in thoracic lymph nodes infected with Mtb and corresponding frequency of cytokine expression in inhibitory receptor-positive T cells.**

Mtb-infected lymph nodes defined as having positive CFU and/or granulomas present in histopathology at time of necropsy. (A) Frequencies of expression of inhibitory receptors on CD3+ T cells from Mtb-infected lymph nodes. Frequencies of cytokine or proliferation marker expression in CD3+ cells from Mtb-infected lymph nodes also expressing (B) PD-1, (C) CTLA-4, or (D) LAG-3. Each point indicates a lymph node, each color corresponds to a NHP (12

NHPs), circles indicate cynomolgus macaque, squares indicate rhesus macaques. Lines at medians.

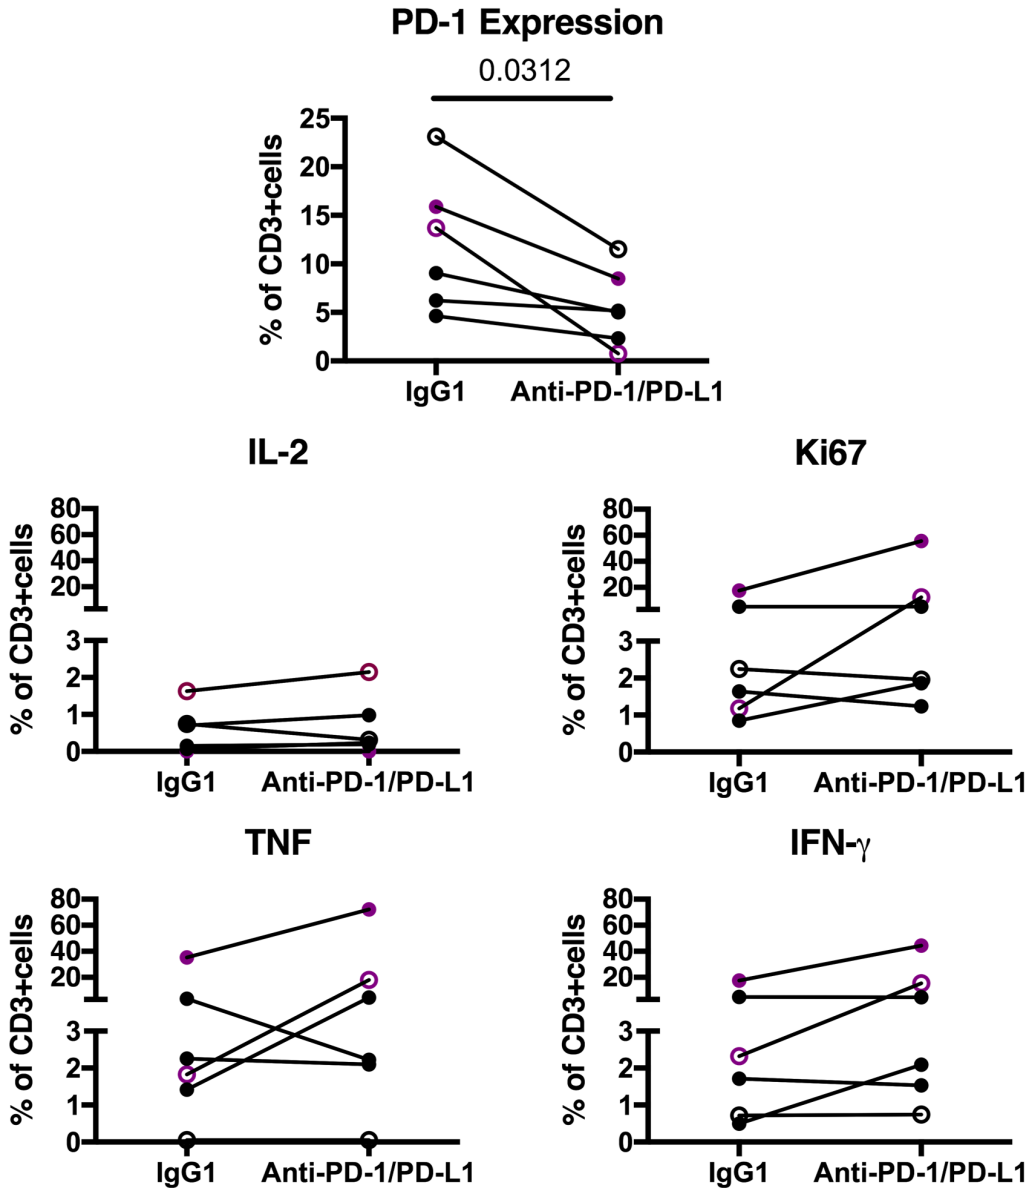

Supp Fig 4. PD-1 and PD-L1 neutralization assay.

PD-1 activity in lung samples and PBMCs from Mtb-infected macaques can be blocked by anti-PD-1 and anti-PD-L1 antibodies, but cytokine and proliferation frequencies do not increase in

response to decreased PD-1 levels and under stimulation with Mtb-specific antigens ESAT-6 and CFP-10. Lines connect matched IgG isotype controls and anti-PD-1/anti-PD-L1 treated samples, each color corresponds to a NHP (2 NHPs), filled circles indicate lung sample, open circles indicate PBMC sample. P-values indicated on figure, Wilcoxon matched-pairs signed rank test.

**Supp Table 1. Frequencies of cells expressing inhibitory receptors PD-1, CTLA-4, or LAG-3 by flow cytometry.** (A) Individual inhibitory receptor expression, or (B) inhibitory receptor co-expression in individual granulomas, complex TB disease, or Mtb-infected LNs from Mtb-infected cynomolgus or rhesus macaques, or in both combined macaque species.

| (A)        |                      |        | <i>PD-1 (%)</i> |         | <i>CTLA4 (%)</i> |          | <i>LAG3 (%)</i> |          |
|------------|----------------------|--------|-----------------|---------|------------------|----------|-----------------|----------|
|            |                      |        | Median          | IQR     | Median           | IQR      | Median          | IQR      |
| <b>CD3</b> | Gran                 | Cyno   | 22.9            | 21.9    | 2.08             | 2.33     | 0.879           | 1.857    |
|            |                      | Rhesus | 9.17            | 12.26   | 1.83             | 4.6265   | 5.12            | 16.625   |
|            |                      | Both   | 16.55           | 18.2575 | 2.015            | 3.01     | 1.53            | 4.4265   |
|            | Complex <sup>a</sup> | Cyno   | 32.6            | 36.752  | 1.1              | 0.751    | 0.231           | 0.165    |
|            |                      | Rhesus | 2.27            | 2.28    | 1.12             | 0.96     | 5.96            | 11.48    |
|            |                      | Both   | 32.1            | 36.011  | 1.1              | 0.8555   | 0.231           | 5.853    |
|            | LymphNode            | Cyno   | 9.53            | 8.675   | 1.685            | 2.31675  | 1.0475          | 1.29315  |
|            |                      | Rhesus | 5.43            | 3.205   | 0.878            | 3.74     | 2.85            | 4.933    |
|            |                      | Both   | 6.74            | 5.87    | 1.36             | 2.604    | 1.17            | 2.109    |
| <b>CD4</b> | Gran                 | Cyno   | 25.2            | 27.1    | 2.83             | 4.3205   | 0.709           | 1.377    |
|            |                      | Rhesus | 10.145          | 13.6125 | 3.075            | 26.54075 | 4.99            | 13.025   |
|            |                      | Both   | 25              | 23.6    | 2.83             | 4.308    | 1.11            | 2.925    |
|            | Complex <sup>a</sup> | Cyno   | 50.6            | 64.37   | 1.49             | 0.95     | 1.5             | 1.771    |
|            |                      | Rhesus | 7.91            | 0       | 0.626            | 0        | 5.63            | 0        |
|            |                      | Both   | 44.75           | 59.25   | 1.47             | 1.2305   | 1.54            | 2.62825  |
|            | LymphNode            | Cyno   | 11.35           | 10.0025 | 2.32             | 2.5665   | 0.653           | 1.40375  |
|            |                      | Rhesus | 10.1            | 8.48    | 13.1             | 69.2774  | 2.45            | 3.3865   |
|            |                      | Both   | 10.3            | 6.2     | 2.86             | 5.117    | 0.988           | 1.921    |
| <b>CD8</b> | Gran                 | Cyno   | 10.845          | 16.3425 | 0.591            | 2.39775  | 0.3465          | 1.525275 |
|            |                      | Rhesus | 9.7             | 9.505   | 0.8875           | 2.8315   | 7.23            | 24.46    |
|            |                      | Both   | 9.995           | 13.6325 | 0.6445           | 1.95     | 1.18            | 4.6715   |

|                      |        |       |        |       |       |        |          |
|----------------------|--------|-------|--------|-------|-------|--------|----------|
| Complex <sup>a</sup> | Cyno   | 24.4  | 24.866 | 0.354 | 0.463 | 0.152  | 1.1365   |
|                      | Rhesus | 1.39  | 0      | 1.21  | 0     | 1.08   | 0        |
|                      | Both   | 21.85 | 24.577 | 0.365 | 0.819 | 0.2245 | 1.098175 |
| LymphNode            | Cyno   | 4.25  | 7.3425 | 1.16  | 1.473 | 0.79   | 2.22025  |
|                      | Rhesus | 3.39  | 3.47   | 1.05  | 5.699 | 0.785  | 1.472    |
|                      | Both   | 3.39  | 3.72   | 1.13  | 2.353 | 0.785  | 1.697    |

| (B)        |                      | <b>C+L+P+ (%)<sup>b</sup></b> |            | <b>C+L-P+ (%)<sup>c</sup></b> |            | <b>C-L+P+ (%)<sup>d</sup></b> |            |          |
|------------|----------------------|-------------------------------|------------|-------------------------------|------------|-------------------------------|------------|----------|
|            |                      | <b>Median</b>                 | <b>IQR</b> | <b>Median</b>                 | <b>IQR</b> | <b>Median</b>                 | <b>IQR</b> |          |
| <b>CD3</b> | Gran                 | Cyno                          | 0.0906     | 0.478                         | 0.698      | 1.7222                        | 0          | 0.551    |
|            |                      | Rhesus                        | 0.593      | 0.94215                       | 0          | 0.4965                        | 2.83       | 4.2205   |
|            |                      | Both                          | 0.1675     | 0.607                         | 0.6        | 1.7525                        | 0.169      | 1.4825   |
|            | Complex <sup>a</sup> | Cyno                          | 0.0257     | 0.109                         | 0.391      | 0.765                         | 0.0793     | 0.145    |
|            |                      | Rhesus                        | 0.04905    | 0.0117                        | 0.073      | 0.146                         | 0.465      | 0.71     |
|            |                      | Both                          | 0.0317     | 0.077525                      | 0.234      | 0.75215                       | 0.11       | 0.4568   |
|            | LymphNode            | Cyno                          | 0.0178     | 0.027665                      | 0.295      | 0.5105                        | 0.13225    | 0.257475 |
|            |                      | Rhesus                        | 0.0132     | 0.1594                        | 0.0719     | 0.3584                        | 0.225      | 0.372175 |
|            |                      | Both                          | 0.0132     | 0.03189                       | 0.28       | 0.4251                        | 0.171      | 0.2366   |
| <b>CD4</b> | Gran                 | Cyno                          | 0          | 0.305                         | 1.21       | 2.0265                        | 0.138      | 0.435    |
|            |                      | Rhesus                        | 0.425      | 1.08                          | 0.2995     | 1.2105                        | 0.705      | 6.3015   |
|            |                      | Both                          | 0          | 0.568                         | 1.11       | 1.88                          | 0.248      | 0.671    |
|            | Complex <sup>a</sup> | Cyno                          | 0.0714     | 0.276                         | 0.712      | 0.922                         | 0.393      | 0.9324   |
|            |                      | Rhesus                        | 0.0894     | 0                             | 0          | 0                             | 2.19       | 0        |
|            |                      | Both                          | 0.0795     | 0.215975                      | 0.4935     | 0.9473                        | 0.5525     | 1.4173   |
|            | LymphNode            | Cyno                          | 0.0342     | 0.07337                       | 0.3        | 0.661475                      | 0.0811     | 0.20175  |
|            |                      | Rhesus                        | 0.252      | 0.329                         | 0.529      | 6.350445                      | 0.0799     | 0.859515 |
|            |                      | Both                          | 0.0407     | 0.24808                       | 0.305      | 0.733                         | 0.0799     | 0.1857   |
| <b>CD8</b> | Gran                 | Cyno                          | 0          | 0                             | 0.02515    | 0.6245                        | 0.02515    | 0.6745   |
|            |                      | Rhesus                        | 0          | 0.477                         | 0          | 0.14975                       | 3.355      | 8.04375  |
|            |                      | Both                          | 0          | 0                             | 0          | 0.46825                       | 0.11665    | 1.9175   |
|            | Complex <sup>a</sup> | Cyno                          | 0          | 0                             | 0.0758     | 0.1348                        | 0.0758     | 0.08118  |
|            |                      | Rhesus                        | 0.315      | 0                             | 0.0899     | 0                             | 0.18       | 0        |
|            |                      | Both                          | 0          | 0.23625                       | 0.08285    | 0.113625                      | 0.07965    | 0.14316  |
|            | LymphNode            | Cyno                          | 0.00392    | 0.018225                      | 0.1385     | 0.15215                       | 0.07735    | 0.299995 |
|            |                      | Rhesus                        | 0          | 0.22365                       | 0.259      | 0.4333                        | 0.092      | 0.11405  |
|            |                      | Both                          | 0          | 0.0273                        | 0.172      | 0.2448                        | 0.0861     | 0.15851  |

a - Complex refers to more severe forms of TB disease, including clusters of granulomas, consolidations, or TB pneumonia

b – C+L+P+ refers to CTLA-4+LAG-3+PD-1+ co-expression

*c* – C+L-P+ refers to CTLA-4+LAG-3-PD-1+ co-expression  
*d* – C-L+P+ refers to CTLA-4-LAG-3+PD-1+ co-expression

**Supp Table 2. Table of parameter ranges used to create both biorepositories of 4500 unique granulomas.** All ranges, with the exception of the exhaustionThreshold, were performed within the ranges outlined by previous versions of GranSim. Our methods section details how we assigned the ranges for the exhaustionThreshold.

| Parameter Name          | Description                                                       | Range         | Units              | Reference |
|-------------------------|-------------------------------------------------------------------|---------------|--------------------|-----------|
| growthExtMtbBound       | Upper bound of number of external Mtb used in growth function     | [180,240]     | Number of bacteria | (1-6)     |
| growthRateIntMtb        | Fractional growth rate of intracellular bacteria                  | [0.001,0.005] | Unitless           | (1-6)     |
| growthRateExtMtb        | Fractional growth rate of extracellular bacteria                  | [0.001,0.003] | Unitless           | (1-6)     |
| deathRateExtMtbCaseated | Upper bound on the number of external Mtb used in growth function | [1,2]         | Number of bacteria | (1-6)     |
| <b>Core</b>             |                                                                   |               |                    |           |
| estBoundFactorTNF       | Adjustment for coarse grained internalized fraction estimate      | [0.4,0.5]     | Unitless           | (1-6)     |
| estBoundFactorIL10      | Adjustment for coarse grained internalized fraction estimate      | [0.4,0.6]     | Unitless           | (1-6)     |
| estConsRateTNF          | Scaling Factor for coarse grained TNF dynamics                    | [5e-4,9e-4]   | Unitless           | (1-6)     |
| estConsRateIL10         | Scaling Factor for coarse grained IL10 dynamics                   | [2e-4,6e-4]   | Unitless           | (1-6)     |
| estIntPartitionTNF      | Scaling Factor for coarse grained internalization of bound TNFR1  | [9,13]        | Unitless           | (1-6)     |
| nrKillingCaseation      | Number of killings for a compartment to become caseated           | [7,13]        | Number             | (1-6)     |

|                        |                                                                         |                |                         |       |
|------------------------|-------------------------------------------------------------------------|----------------|-------------------------|-------|
| caseationHealingTime   | Time it takes for a caseated compartment to heal                        | [1700,2600]    | Timesteps               | (1-6) |
| sourceDensity          | Density of vascular sources on the gridspace                            | [0.002,0.05]   | Unitless                | (1-6) |
| diffusivityTNF         | TNF diffusivity                                                         | [4e-08, 6e-08] | Cm <sup>2</sup> /second | (1-6) |
| diffusivityChemokines  | Chemokine diffusivity                                                   | [4e-08,6e-08]  | Cm <sup>2</sup> /second | (1-6) |
| diffusivityIL10        | IL10 diffusivity                                                        | [4e-08,6e-08]  | Cm <sup>2</sup> /second | (1-6) |
| ChemokinekDeg          | Chemokine degradation rate constant                                     | [0.0005,0.005] | 1/second                | (1-6) |
| kDeg                   | TNF degradation rate constant                                           | [0.0005,0.005] | 1/second                | (1-6) |
| Ikdeg                  | Degradation rate constant for IL10                                      | [0.0003,0.003] | 1/second                | (1-6) |
| IC50ChemokineIL10      | IC50 of IL10 inhibition of chemokine secretion                          | [1,10]         | Molecules/mL            | (1-6) |
| thresholdApoptosisTNF  | TNF threshold for TNF-induced apoptosis                                 | [1000, 5000]   | Unitless                | (1-6) |
| kApoptosis             | Rate of apoptosis happening                                             | [1e-07, 2e-6]  | 1/second                | (1-6) |
| saturationApoptosisTNF | Signal saturation of number of internal bound TNFR1 Molecules           | [5000, 9000]   | Molecules               | (1-6) |
| minChemotaxis          | Minimum of Chemotaxis sensitivity range                                 | [1, 50]        | Molecules               | (1-6) |
| maxChemotaxis          | Maximum of Chemotaxis sensitivity range                                 | [100,1000]     | Molecules               | (1-6) |
| maxIL10Inhibition      | Coarse grained TNF/IL10 dose dependence parameter beta                  | [0.05, 0.3]    | Log10(ng/mL)            | (1-6) |
| <b>Mac</b>             |                                                                         |                |                         |       |
| initDensity            | Initial density of macrophages on the gridspace                         | [0.005,0.03]   | Unitless                | (1-6) |
| movementRest           | Time required for a resting macrophage to move one micro-compartment    | [1,10]         | Timesteps               | (1-6) |
| movementAct            | Time required for an activated macrophage to move one micro-compartment | [10,50]        | Timesteps               | (1-6) |



|                    |                                                                                                               |                |                  |       |
|--------------------|---------------------------------------------------------------------------------------------------------------|----------------|------------------|-------|
| movementInf        | Time required for an infected macrophage to move one micro-compartment                                        | [100,200]      | Timesteps        | (1-6) |
| dTNF               | Secretion rate of TNF by a macrophage                                                                         | [1.3,1.7]      | Molecules/second | (1-6) |
| dCCL2              | Secretion rate of CCL2 by a macrophage                                                                        | [4,8]          | Molecules/second | (1-6) |
| dCCL5              | Secretion rate of CCL5 by a macrophage                                                                        | [4,8]          | Molecules/second | (1-6) |
| dIL10Act           | Secretion rate of IL10 by an activated macrophage                                                             | [0.2, 0.4]     | Molecules/second | (1-6) |
| halfSatIL10        | Half saturation for TNF induction of IL10 in an activated macrophage                                          | [170,210]      | Number/cell      | (1-6) |
| thresholdNFkB TNF  | TNF threshold for NFkB activation                                                                             | [75,115]       | Molecules        | (1-6) |
| kNFkB              | Rate of NFkB activation                                                                                       | [0.7e-5, 1e-5] | Fraction         | (1-6) |
| probKillExtMtbRest | Probability of a resting macrophage to kill extracellular bacteria                                            | [0.05, 0.3]    | Unitless         | (1-6) |
| fKillExtMtbRest    | Fractional increase of a resting macrophage to kill extracellular bacteria when STAT1 or NFkB pathways are on | [0.3,0.5]      | Unitless         | (1-6) |
| nrExtMtbNFkB       | Number of extracellular bacteria for NFkB activation in an infected macrophage                                | [150, 250]     | Bacteria         | (1-6) |
| nrIntMtbCInf       | Number of intracellular bacteria necessary for an infected macrophage to become chronically infected          | [8,12]         | Bacteria         | (1-6) |
| nrIntMtbBurstCInf  | Number of intracellular bacteria necessary for a chronically                                                  | [13,20]        | Bacteria         | (1-6) |

|                            |                                                                                     |                                                                           |                  |           |
|----------------------------|-------------------------------------------------------------------------------------|---------------------------------------------------------------------------|------------------|-----------|
|                            | infected macrophage to burst                                                        |                                                                           |                  |           |
| nrExtMtbUptakeAct          | Number of extracellular bacteria an activated macrophage can uptake and kill        | [3,7]                                                                     | Bacteria         | (1-6)     |
| Stat1ActivationTime        | Time a macrophage is Stat1 activated                                                | [400,460]                                                                 | Timesteps        | (1-6)     |
| nfkbActivationTime         | Time a macrophage is NFkB activated                                                 | [13,17]                                                                   | Timesteps        | (1-6)     |
| Stat3ActivationTime        | Time a macrophage is Stat3 activated                                                | [75,125]                                                                  | Timesteps        | (1-6)     |
| thresholdSTAT3IL10         | Threshold of IL10 to IL10R1 for STAT3 signaling                                     | [5,15]                                                                    | Unitless         | (1-6)     |
| kSTAT3IL10                 | Rate constant of bound IL10 to IL10R1 for STAT3 signaling                           | [5e-4, 1.5e-3]                                                            | Unitless         | (1-6)     |
| probHealCaseation          | Rate constant for wound healing                                                     | [0.005, 0.05]                                                             | Unitless         | (1-6)     |
| <b>T cell</b>              |                                                                                     |                                                                           |                  |           |
| maxAge                     | Maximum age of a T cell                                                             | [400,460]                                                                 | Timesteps        | (1-6)     |
| exhaustionThreshold        | Threshold of Exposure Events for an individual T cell before it becomes exhausted   | [200, 10000]<br>(5236 during generation of 2 <sup>nd</sup> biorepository) | Count            | Estimated |
| probMoveToMac              | Probability of a T cell moving into a compartment already containing a macrophage   | [0.01, 0.2]                                                               | Unitless         | (1-6)     |
| probMoveToTcell            | Probability of a T cell moving into a compartment already containing another T cell | [0.01, 0.2]                                                               | Unitless         | (1-6)     |
| maxDivisions               | Maximum number of times a T cell can create a daughter cell                         | [3,5]                                                                     | Timesteps        | (1-6)     |
| <b>γ-producing T cells</b> |                                                                                     |                                                                           |                  |           |
| dTNF                       | Secretion rate of TNF by γ-producing T cell                                         | [0.1, 0.2]                                                                | Molecules/second | (1-6)     |
| maxTimeReg                 | Time span during which a γ producing T cell remains down-regulated                  | [30,40]                                                                   | Timesteps        | (1-6)     |

|                           |                                                                                                    |                |                  |       |
|---------------------------|----------------------------------------------------------------------------------------------------|----------------|------------------|-------|
| probApoptosisFasFasL      | Probability of Fas/FasL induced apoptosis by a $\gamma$ -producing T cell                          | [0.01,0.03]    | Unitless         | (1-6) |
| probTNFProducer           | Probability that a $\gamma$ -producing T cell can produce TNF                                      | [0.04, 0.1]    | Unitless         | (1-6) |
| probIFNProducer           | Probability that a $\gamma$ -producing T cell can produce IFN $\gamma$                             | [0.3, 0.4]     | Unitless         | (1-6) |
| probIFNMooreExtend        | Probability a macrophage will be IFN $\gamma$ /STAT1 activated in the extended Moore Neighborhood. | [0.2, 0.3]     | Unitless         | (1-6) |
| <b>Cytotoxic T cells</b>  |                                                                                                    |                |                  |       |
| dTNF                      | Secretion rate of TNF by a cytotoxic T cell                                                        | [0.01, 0.02]   | Molecules/second | (1-6) |
| maxTimeReg                | Time span during which a cytotoxic T cell remains down-regulated                                   | [30,40]        | Timesteps        | (1-6) |
| probKillMac               | Probability of a cytotoxic T cell killing a chronically infected mac                               | [0.005, 0.015] | Unitless         | (1-6) |
| probKillMacCleanly        | Probability of a cytotoxic T cell killing a chronically infected mac cleanly                       | [0.6, 0.9]     | Unitless         | (1-6) |
| probTNFProducer           | Probability that a cytotoxic T cell is producing TNF                                               | [0.05, 0.09]   | Unitless         | (1-6) |
| <b>Regulatory T cells</b> |                                                                                                    |                |                  |       |
| dIL10                     | Secretion of IL10 by a regulatory T cell                                                           | [0.7, 0.8]     | Molecules/second | (1-6) |
| probTregDeactivate        | Probability of successful downregulation by a regulatory T cell                                    | [0.01, 0.02]   | Unitless         | (1-6) |
| factorDeactIL10           | Factor when a regulatory T cell is making IL10 to scale probTregDeactivate                         | [1,3]          | Unitless         | (1-6) |

## Supporting Information References

1. Cilfone NA, Ford CB, Marino S, Mattila JT, Gideon HP, Flynn JL, Kirschner DE, Linderman JJ. 2015. Computational modeling predicts IL-10 control of lesion sterilization by balancing early host immunity-mediated antimicrobial responses with caseation during *Mycobacterium tuberculosis* infection. *The Journal of Immunology* 194:664-677.
2. Fallahi-Sichani M, El-Kebir M, Marino S, Kirschner DE, Linderman JJ. 2011. Multiscale computational modeling reveals a critical role for TNF- $\alpha$  receptor 1 dynamics in tuberculosis granuloma formation. *The Journal of Immunology* 186:3472-3483.
3. Pienaar E, Cilfone NA, Lin PL, Dartois V, Mattila JT, Butler JR, Flynn JL, Kirschner DE, Linderman JJ. 2015. A computational tool integrating host immunity with antibiotic dynamics to study tuberculosis treatment. *J Theor Biol* 367:166-79.
4. Ray JCJ, Flynn JL, Kirschner DE. 2009. Synergy between individual TNF-dependent functions determines granuloma performance for controlling *Mycobacterium tuberculosis* infection. *The Journal of Immunology* 182:3706-3717.
5. Segovia-Juarez JL, Ganguli S, Kirschner D. 2004. Identifying control mechanisms of granuloma formation during *M. tuberculosis* infection using an agent-based model. *Journal of theoretical biology* 231:357-376.

6. Warsinske HC, Pienaar E, Linderman JJ, Mattila JT, Kirschner DE. 2017. Deletion of TGF-beta1 Increases Bacterial Clearance by Cytotoxic T Cells in a Tuberculosis Granuloma Model. *Front Immunol* 8:1843.
